# Supplementary material for: Endocannabinoid-Goα signalling inhibits axon regeneration in Caenorhabditis elegans by antagonizing Gqα-PKC-JNK signalling
Source: PubMed Central journal article supplement — Nat Commun. 2012 Oct 16;3:1136–. doi: 10.1038/ncomms2136 (PMC3493645; doi:10.1038/ncomms2136), 2012-10-16
Supplement: ncomms2136-s1.pdf [file ncomms2136-s1.pdf]

# Supplementary Information

## **Endocannabinoid-Go $\alpha$ signalling inhibits axon regeneration by antagonizing the Gq $\alpha$ -PKC-JNK cascade in *C. elegans***

**Strahil Iv. Pastuhov<sup>1</sup>, Kota Fujiki<sup>1</sup>, Paola Nix<sup>2</sup>, Shuka Kanao<sup>1</sup>, Michael Bastiani<sup>2</sup>, Kunihiro Matsumoto<sup>1,3</sup> and Naoki Hisamoto<sup>1,3</sup>**

<sup>1</sup>Department of Molecular Biology, Graduate school of Science, Nagoya University, Chikusa-ku, Nagoya 464-8602, Japan

<sup>2</sup>Department of Biology, University of Utah, 257 South 1400 East, Salt Lake City, UT 84112-0840, USA

<sup>3</sup>To whom correspondence should be addressed:

Kunihiro Matsumoto, Naoki Hisamoto

Department of Molecular Biology, Graduate School of Science,  
Nagoya University, Chikusa-ku, Nagoya 464-8602, Japan.

Fax: 81-52-789-2589 or 3001

E-mail address: g44177a@nucc.cc.nagoya-u.ac.jp

|        |     |                                                                 |
|--------|-----|-----------------------------------------------------------------|
| FAAH1  | 1   | MVQYELWAALPGASGVALACCFVAAAVALRWSGRRRTARGAVVRARORORAGLENMDRAAQ   |
| FAAH-1 | 1   | MIFYLVLLVLGAIAFYVHFSNNR-----KKLIERLEIVAQRDRDDL SKNVEQAR         |
| FAAH1  | 61  | RFRLQNPDL DSEALLALPLPOLVOKLHSRELAPEAVLFTYV GKAWENVKGTNCVTSYLAD  |
| FAAH-1 | 50  | KAADKLD TQR RDWIGSLDFEQLRDELQRGHVTCVEAIRAYFKAILAHEKTNVAVTCFILD  |
| FAAH1  | 121 | CE---TQLSQAPR-----QGLLYGVFVSLKECFYKGDSTLGLSLNEGVP AECDSVVVH     |
| FAAH-1 | 110 | AERQAEELDEQAKLPYYVKPPLFGVPLSLKECLKVKGYDTRRGFVODAYHPATEDS IQVE   |
| FAAH1  | 173 | VLKLOGAVPFVHTNVPOSMSFSYDCSNPLFGQTVNPKWSSKSPGGSSGGEGALIGSGGSPL   |
| FAAH-1 | 170 | HYKKLGLIPFCQTNVQSLLSYNCSNPLFGTITNPDSTRTCGGSSGGEGALIGAGGSLI      |
| FAAH1  | 233 | GLGTDIGGSI RFPSSFCGICGLKPTGNRLSKSGLKGCVYGQEA VRLSVGP MARDVESLAL |
| FAAH-1 | 230 | GIGTDVGGSVRI PC HFTGTAGIKPSKMRFAHRGGASVPGKPLIDANDGPMADKVKTNVE   |
| FAAH1  | 293 | CLRALLCEDMFR--LDPTVPPLPFRFEVYTS SQPLRVGY YETDN YTMPSPAMRRAVLETK |
| FAAH-1 | 290 | FLRNWGDIDFQSDRDPYCPVHWNESVYSSEKLRVGY YIDGWF TPTPALQRAVLESK      |
| FAAH1  | 351 | QSLEAAGHTLVPLPSPNIPHALET LSTGGLFSDGGHTFLQNFKGFVDFPCLGDLVSIKLL   |
| FAAH-1 | 350 | KHLEAAGHTVIPFPYPPRLPSVMQ--LYFRAVCLDGGQYV LNKLLKDIIEPTIRFOVTLWMV |
| FAAH1  | 411 | PQWLKGLLAFLVKPLLPRLSAFLSNMKSRSAGKLWELQHEIEVYRKT VIAQWRALDLDV    |
| FAAH-1 | 409 | PVWIQRILSYPVSLVFRPMGMLMQSL-TRDTFELREAYADIEAYREEFVGLMMKDNLDVI    |
| FAAH1  | 471 | LTPM-LAPALDLNAPGRATGAVSYTMLYNCLDFPAGVVPVTTVTAEDEAQM-EHYRGYFG    |
| FAAH-1 | 468 | LCPASIMPAPQHDIPSKVSVGSYTCLYNLDFGAGVVPVTA VSKSDEEKLIN EYPE--T    |
| FAAH1  | 529 | DIWDKMLQGMKKS VGLPVAVQCVALPWOELCLRFMREVERLMTPEKQSS              |
| FAAH-1 | 526 | DKWYQITK KATLGAVGMPIGVOVAAPPYREEAVLRTMREIEIAVTGK                |

**Supplementary Figure S1. Comparison between *C. elegans* FAAH-1 and human FAAH1.** The putative transmembrane and amidase domains are boxed. Identical and similar residues are highlighted with black and gray shading, respectively. Black triangles show the conserved residues required for amidase catalytic activity.

**a**

*faah-1* DNA

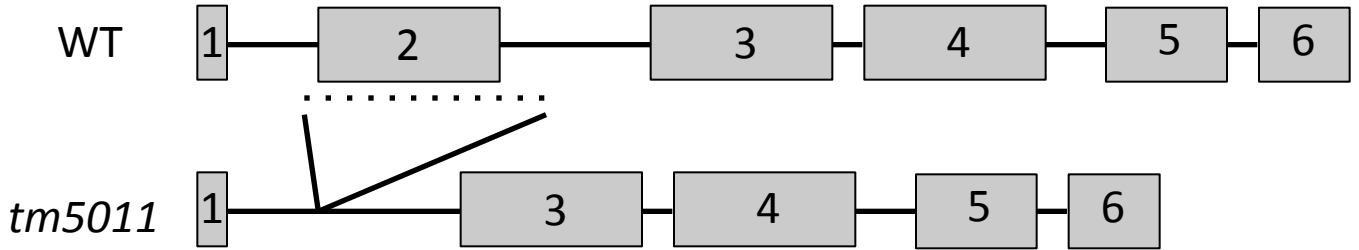

**b**

*faah-1* cDNA

61

|               |        |     |     |     |     |            |            |            |            |               |
|---------------|--------|-----|-----|-----|-----|------------|------------|------------|------------|---------------|
| WT            | ...aat | aat | cga | aaa | aag | ctc        | att        | gaa        | cga        | ctt...        |
|               | N      | N   | R   | K   | K   | L          | I          | E          | R          | L             |
| <i>tm5011</i> | ...aat | aat | cga | aaa | aag | <b>gac</b> | <b>taa</b> | <b>ttc</b> | <b>cat</b> | <b>ttt...</b> |
|               | N      | N   | R   | K   | K   | <b>D</b>   | *          | <b>F</b>   | <b>H</b>   | <b>F</b>      |

**Supplementary Figure S2. *faah-1(tm5011)* is a null allele.**

**(a)** Comparison of the structure of the *faah-1* gene in wild type and *faah-1(tm5011)* mutants. Exons and introns are represented by grey boxes and black lines, respectively.

The dotted line corresponds to the region deleted in *tm5011*.

**(b)** Comparison of the sequence of the transcribed *faah-1* gene in wild-type and *faah-1(tm5011)* mutants. The *tm5011* deletion causes splicing of exon 3 right after exon 1 which results in a frame shift (bold) and a premature stop codon (\*). Small letters indicate nucleotides and capital letters indicate the corresponding amino acids.

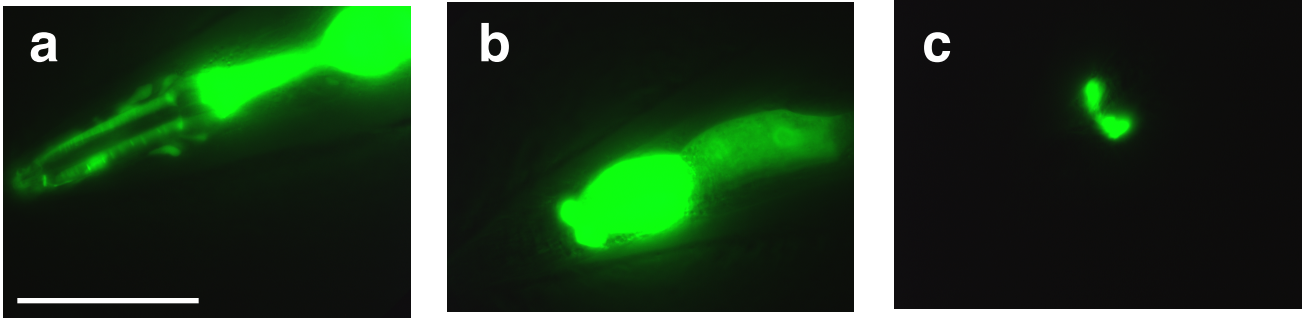

**Supplementary Figure S3. Expression pattern of fluorescent protein under the control of the *faah-1* promoter.**

Fluorescent images of animals carrying *Pfaah-1::gfp* transgene are shown. Expression of the transgene is seen mainly in the pharynx (a), the posterior intestine (b) and the anal depressor muscles (c). Scale bar: 50  $\mu$ m.

**Supplementary Table S1. Raw data for axon regeneration.**

| Strain | Genotype                                        | Treatment | Age    | No. of animals | No. of axons | No. of regeneration (% of total) | P value | compared with |
|--------|-------------------------------------------------|-----------|--------|----------------|--------------|----------------------------------|---------|---------------|
| KU501  | <i>juls76</i>                                   | EtOH      | YA     | 72             | 99           | 63 (64%)                         | -       | -             |
| KU501  | <i>juls76</i>                                   | EtOH      | YA+48h | 53             | 60           | 34 (57%)                         | 0.406   | KU501         |
| KU501  | <i>juls76</i>                                   | EtOH      | YA+72h | 21             | 23           | 14 (61%)                         | 0.814   | KU501         |
| KU501  | <i>juls76</i>                                   | AEA       | YA     | 50             | 78           | 22 (28%)                         | <0.001  | KU501         |
| KU501  | <i>juls76</i>                                   | EPEA      | YA     | 69             | 89           | 41 (46%)                         | 0.019   | KU501         |
| KU501  | <i>juls76</i>                                   | EtOH      | L4     | 39             | 52           | 34 (65%)                         | 0.86    | KU501         |
| KU501  | <i>juls76</i>                                   | AEA       | L4     | 42             | 61           | 35 (57%)                         | 0.441   | KU501, L4     |
| KU451  | <i>juls76; faah-1</i>                           | EtOH      | YA     | 93             | 152          | 59 (39%)                         | <0.001  | KU501         |
| KU451  | <i>juls76; faah-1</i>                           | EtOH      | YA+48h | 45             | 45           | 14 (31%)                         | 0.384   | KU451         |
| KU451  | <i>juls76; faah-1</i>                           | EtOH      | YA+72h | 34             | 35           | 15 (43%)                         | 0.703   | KU451         |
| KU451  | <i>juls76; faah-1</i>                           | EtOH      | L4     | 33             | 48           | 29 (60%)                         | 0.012   | KU451         |
| KU452  | <i>juls76; faah-1; Ex[Pmyo-2::faah-1]</i>       | EtOH      | YA     | 34             | 36           | 21 (58%)                         | 0.04    | KU451         |
| KU453  | <i>juls76; faah-1; Ex[Punc-25::faah-1]</i>      | EtOH      | YA     | 54             | 63           | 35 (56%)                         | 0.034   | KU451         |
| KU454  | <i>juls76; goa-1 (lf)</i>                       | EtOH      | YA     | 37             | 53           | 32 (60%)                         | 0.727   | KU501         |
| KU454  | <i>juls76; goa-1 (lf)</i>                       | AEA       | YA     | 32             | 52           | 31 (60%)                         | 1       | KU454         |
| KU455  | <i>juls76; goa-1 Q205L (gf)</i>                 | EtOH      | YA     | 46             | 54           | 17 (31%)                         | <0.001  | KU501         |
| KU455  | <i>juls76; goa-1 Q205L (gf)</i>                 | AEA       | YA     | 41             | 52           | 19 (37%)                         | 0.683   | KU455         |
| KU456  | <i>juls76; egl-30 (lf)</i>                      | EtOH      | YA     | 79             | 106          | 39 (37%)                         | <0.001  | KU501         |
| KU456  | <i>juls76; egl-30 (lf)</i>                      | AEA       | YA     | 48             | 62           | 23 (37%)                         | 1       | KU456         |
| KU456  | <i>juls76; egl-30 (lf)</i>                      | EtOH      | L4     | 42             | 54           | 35 (65%)                         | 0.001   | KU456         |
| KU457  | <i>juls76; egl-30 (gf)</i>                      | EtOH      | YA     | 45             | 50           | 30 (60%)                         | 0.721   | KU501         |
| KU457  | <i>juls76; egl-30 (gf)</i>                      | AEA       | YA     | 39             | 46           | 26 (57%)                         | 0.836   | KU457         |
| KU458  | <i>juls76; egl-30 (lf); Ex[Punc-25::egl-30]</i> | EtOH      | YA     | 52             | 80           | 56 (70%)                         | <0.001  | KU456         |
| KU458  | <i>juls76; egl-30 (lf); Ex[Punc-25::egl-30]</i> | AEA       | YA     | 31             | 36           | 13 (36%)                         | 0.001   | KU458         |
| KU459  | <i>juls76; egl-30 (lf); MLK-1 OE</i>            | EtOH      | YA     | 76             | 98           | 51 (52%)                         | 0.034   | KU456         |
| KU460  | <i>juls76; egl-8</i>                            | EtOH      | YA     | 62             | 81           | 26 (32%)                         | <0.001  | KU501         |
| KU461  | <i>juls76; tpa-1</i>                            | EtOH      | YA     | 65             | 125          | 52 (42%)                         | 0.001   | KU501         |
| KU461  | <i>juls76; tpa-1</i>                            | EtOH      | L4     | 37             | 44           | 27 (61%)                         | 0.034   | KU461         |
| KU462  | <i>juls76; mlk-1</i>                            | EtOH      | YA     | 45             | 75           | 19 (25%)                         | <0.001  | KU501         |
| KU462  | <i>juls76; mlk-1</i>                            | AEA       | YA     | 48             | 71           | 25 (35%)                         | 0.211   | KU462         |
| KU462  | <i>juls76; mlk-1</i>                            | EtOH      | L4     | 33             | 50           | 15 (30%)                         | 0.682   | KU462         |
| KU463  | <i>juls76; mlk-1; egl-30 (lf)</i>               | EtOH      | YA     | 52             | 89           | 26 (29%)                         | 0.603   | KU462         |
| KU464  | <i>juls76; mlk-1; Ex[Punc-25::mlk-1]</i>        | EtOH      | YA     | 39             | 48           | 30 (63%)                         | <0.001  | KU462         |
| KU464  | <i>juls76; mlk-1; Ex[Punc-25::mlk-1]</i>        | AEA       | YA     | 23             | 29           | 9 (31%)                          | 0.01    | KU464         |
| KU465  | <i>juls76; mlk-1; Ex[Punc-25::mlk-1 S355A]</i>  | EtOH      | YA     | 41             | 51           | 21 (41%)                         | 0.045   | KU464         |
| KU466  | <i>juls76; mlk-1; Ex[Punc-25::mlk-1 S355E]</i>  | EtOH      | YA     | 47             | 55           | 33 (60%)                         | 0.841   | KU464         |
| KU466  | <i>juls76; mlk-1; Ex[Punc-25::mlk-1 S355E]</i>  | AEA       | YA     | 50             | 52           | 31 (60%)                         | 1       | KU466         |
| KU467  | <i>juls76; mlk-1; egl-30 (gf)</i>               | EtOH      | YA     | 69             | 73           | 27 (37%)                         | 0.017   | KU457         |
| KU468  | <i>juls76; svh-2</i>                            | EtOH      | YA     | 38             | 55           | 12 (22%)                         | <0.001  | KU501         |
| KU468  | <i>juls76; svh-2</i>                            | AEA       | YA     | 36             | 51           | 12 (24%)                         | 1       | KU468         |
| KU469  | <i>juls73; shc-1</i>                            | EtOH      | YA     | 47             | 55           | 18 (33%)                         | <0.001  | KU501         |
| KU470  | <i>juls76; tpa-1; Ex[Punc-25::mlk-1 S355A]</i>  | EtOH      | YA     | 37             | 45           | 16 (36%)                         | 0.586   | KU461         |
| KU471  | <i>juls76; tpa-1; Ex[Punc-25::mlk-1 S355E]</i>  | EtOH      | YA     | 39             | 47           | 30 (64%)                         | 0.011   | KU461         |
| KU472  | <i>juls76; mlk-1; tpa-1</i>                     | EtOH      | YA     | 54             | 57           | 14 (25%)                         | 1       | KU462         |
| KU473  | <i>juls76; egl-30 (lf); svh-2</i>               | EtOH      | YA     | 50             | 50           | 15 (30%)                         | 0.377   | KU468         |
| KU474  | <i>juls76; tpa-1; svh-2</i>                     | EtOH      | YA     | 56             | 57           | 16 (28%)                         | 0.516   | KU468         |

Young Adults (YA) or fourth larval stage (L4) animals were operated on, treated with ethanol (EtOH), anandamide (AEA) or EPEA for 6 hours and then were assayed for axon regeneration 24, 48 (YA+48) or 72 (YA+72) hours after the operation.

P values are two-tailed and are calculated against ethanol-treated young adult (or L4) animals of the indicated strains, using Fisher's exact test.

## Supplementary Table S2. Strains used in this study.

| <b>strain</b> | <b>genotype</b>                                                                           |
|---------------|-------------------------------------------------------------------------------------------|
| KU501         | <i>juls76</i> II                                                                          |
| KU451         | <i>juls76</i> II; <i>faah-1(tm5011)</i> IV                                                |
| KU452         | <i>juls76</i> II; <i>faah-1(tm5011)</i> IV; <i>Ex[Pmyo-2::faah-1]</i>                     |
| KU453         | <i>juls76</i> II; <i>faah-1(tm5011)</i> IV; <i>Ex[Punc-25::faah-1]</i>                    |
| KU454         | <i>juls76</i> II; <i>goa-1(n1134)</i> I                                                   |
| KU455         | <i>juls76</i> II; <i>dpy-20(e1362)</i> IV; <i>In[goa-1 Q205L + dpy-20]</i>                |
| KU456         | <i>juls76</i> II; <i>egl-30(ad805)</i> I                                                  |
| KU457         | <i>juls76</i> II; <i>egl-30(tg26)</i> I                                                   |
| KU458         | <i>juls76</i> II; <i>egl-30(ad805)</i> I; <i>Ex[Punc-25::egl-30 + Pmyo-2::dsredm]</i>     |
| KU459         | <i>juls76</i> II; <i>egl-30(ad805)</i> I; <i>Ex[MLK-1 OE + Pmyo-2::dsredm]</i>            |
| KU460         | <i>juls76</i> II; <i>egl-8(nd971)</i> V                                                   |
| KU461         | <i>juls76</i> II; <i>tpa-1(k501)</i> IV                                                   |
| KU462         | <i>juls76</i> II; <i>mlk-1(km19)</i> V                                                    |
| KU463         | <i>juls76</i> II; <i>mlk-1(km19)</i> V; <i>egl-30(ad805)</i> I                            |
| KU464         | <i>juls76</i> II; <i>mlk-1(km19)</i> V; <i>Ex[Punc-25::mlk-1 + Pmyo-2::dsredm]</i>        |
| KU465         | <i>juls76</i> II; <i>mlk-1(km19)</i> V; <i>Ex[Punc-25::mlk-1 S355A + Pmyo-2::dsredm]</i>  |
| KU466         | <i>juls76</i> II; <i>mlk-1(km19)</i> V; <i>Ex[Punc-25::mlk-1 S355E + Pmyo-2::dsredm]</i>  |
| KU467         | <i>juls76</i> II; <i>mlk-1(km19)</i> V; <i>egl-30(tg26)</i> I                             |
| KU468         | <i>juls76</i> II; <i>svh-2(tm737)</i> X                                                   |
| KU469         | <i>juls73</i> III; <i>shc-1(ok198)</i> I                                                  |
| KU470         | <i>juls76</i> II; <i>tpa-1(k501)</i> IV; <i>Ex[Punc-25::mlk-1 S355A + Pmyo-2::dsredm]</i> |
| KU471         | <i>juls76</i> II; <i>tpa-1(k501)</i> IV; <i>Ex[Punc-25::mlk-1 S355E + Pmyo-2::dsredm]</i> |
| KU472         | <i>juls76</i> II; <i>mlk-1(km19)</i> V; <i>tpa-1(k501)</i> IV                             |
| KU473         | <i>juls76</i> II; <i>egl-30(ad805)</i> I; <i>svh-2(tm737)</i> X                           |
| KU474         | <i>juls76</i> II; <i>tpa-1(k501)</i> IV; <i>svh-2(tm737)</i> X                            |
